# Supplementary material for: Association of hypertension with mortality in patients hospitalised with COVID-19
Source: HighWire-hosted journal article supplement (doi:10.1136/openhrt-2021-001853), 2021-12-01
Supplement: openhrt-2021-001853supp001_data_supplement.pdf [file openhrt-2021-001853supp001_data_supplement.pdf]

**Supplementary Table 1. Baseline demographics and comorbidities of patients with a pre-existing diagnosis of hypertension on admission**

|                                                                           | All patients<br>(n=270) | Discharged<br>(n=212) | Deceased<br>(n=58) | P value |
|---------------------------------------------------------------------------|-------------------------|-----------------------|--------------------|---------|
| Mean age (SD) - yr                                                        | 72.7 (14.0)             | 69.8 (13.8)           | 83.1 (9.3)         | <.001   |
| Male – no. (%)                                                            | 131 (48.5)              | 100 (47.2)            | 31 (53.4)          | .459    |
| Healthcare worker – no. (%)                                               | 5 (1.9)                 | 4 (1.9)               | 1 (1.7)            | 1.000   |
| Nursing home resident – no. (%)                                           | 62 (23)                 | 37 (17.5)             | 25 (43.1)          | <.001   |
| Coronary artery disease – no. (%)                                         | 50 (18.5)               | 33 (15.6)             | 17 (29.3)          | .022    |
| Heart failure or cardiomyopathy – no. (%)                                 | 27 (10)                 | 12 (5.7)              | 15 (25.9)          | <.001   |
| Atrial fibrillation or flutter – no. (%)                                  | 44 (16.3)               | 31 (14.6)             | 13 (22.4)          | .163    |
| Severe valvular disease – no. (%)                                         | 10 (3.7)                | 6 (2.8)               | 4 (6.9)            | .229    |
| Stroke or Transient ischemic attack – no. (%)                             | 31 (11.5)               | 20 (9.4)              | 11 (19.0)          | .061    |
| Hypercholesterolemia – no. (%)                                            | 125 (46.3)              | 99 (46.7)             | 26 (44.8)          | .882    |
| Diabetes mellitus – no. (%)                                               | 107 (39.6)              | 80 (37.7)             | 27 (46.6)          | .230    |
| Peripheral arterial disease – no. (%)                                     | 5 (1.9)                 | 5 (2.4)               | 0 (0)              | .588    |
| Current or recent smoker (<1 year) – no. (%)                              | 14 (5.2)                | 11 (5.2)              | 3 (5.2)            | 1.000   |
| Chronic obstructive pulmonary disorder – no. (%)                          | 32 (11.9)               | 21 (9.9)              | 11 (19.0)          | .068    |
| Asthma – no. (%)                                                          | 33 (12.2)               | 28 (13.2)             | 5 (8.6)            | .497    |
| Chronic kidney disease (eGFR < 60mL/min/1.73m <sup>2</sup> ) –<br>no. (%) | 41 (15.2)               | 25 (11.8)             | 16 (27.6)          | .006    |
| ACE inhibitor – no. (%)                                                   | 71 (26.3)               | 54 (25.5)             | 17 (29.3)          | .614    |
| ARB – no. (%)                                                             | 100 (37.0)              | 88 (41.5)             | 12 (20.7)          | .004    |
| Mineralocorticoid receptor antagonist – no. (%)                           | 11 (4.1)                | 8 (3.8)               | 3 (5.2)            | .707    |
| Loop diuretic – no. (%)                                                   | 46 (17.0)               | 25 (11.8)             | 21 (36.2)          | <.001   |
| Thiazide diuretic – no. (%)                                               | 33 (12.2)               | 27 (12.7)             | 6 (10.3)           | .821    |

|                                                       |           |           |           |       |
|-------------------------------------------------------|-----------|-----------|-----------|-------|
| Beta blocker – no. (%)                                | 68 (25.2) | 48 (22.6) | 20 (34.5) | .087  |
| Non-dihydropyridine calcium channel blocker – no. (%) | 6 (2.2)   | 5 (2.4)   | 1 (1.7)   | 1.000 |
| Dihydropyridine calcium channel blocker – no. (%)     | 77 (28.5) | 65 (30.7) | 12 (20.7) | .144  |

**Supplementary Table 2. Unadjusted odds ratios for in-hospital mortality by baseline characteristics of patients with a pre-existing diagnosis of hypertension on admission**

| Variable                                                     | Odds Ratio (95% CI)    | P value |
|--------------------------------------------------------------|------------------------|---------|
| Age - yr                                                     | 1.107 (1.071 - 1.145)  | <.001   |
| Male                                                         | 1.286 (.718 – 2.302)   | .379    |
| ACE inhibitor                                                | 1.213 (.637 – 2.311)   | .557    |
| ARB                                                          | .368 (.184 – .734)     | .005    |
| Coronary artery disease                                      | 2.249 (1.144 – 4.423)  | .019    |
| Heart failure or cardiomyopathy                              | 5.814 (2.542 – 13.300) | <.001   |
| Atrial fibrillation or flutter                               | 1.687 (.817 – 3.484)   | .158    |
| Severe valvular disease                                      | 2.543 (.693 – 9.333)   | .159    |
| Stroke or Transient ischemic attack                          | 2.247 (1.008 – 5.010)  | .048    |
| Hypercholesterolemia                                         | .927 (.517 – 1.662)    | .800    |
| Diabetes mellitus                                            | 4.437 (.800 – 2.582)   | .225    |
| Peripheral arterial disease                                  | .000 (.000 - .)        | .999    |
| Current or recent smoker                                     | .997 (.269 – 3.698)    | .996    |
| Chronic obstructive pulmonary disease                        | 2.129 (.960 – 4.720)   | .063    |
| Asthma                                                       | .620 (.228 – 1.684)    | .348    |
| Chronic kidney disease (eGFR < 60mL/min/1.73m <sup>2</sup> ) | 2.850 (1.399 – 5.803)  | .004    |

**Supplementary Table 3. Adjusted odds ratios for in-hospital mortality by baseline characteristics of patients with a pre-existing diagnosis of hypertension on admission**

| Variable                                                     | Odds Ratio (95% CI)   | P value |
|--------------------------------------------------------------|-----------------------|---------|
| Age - yr                                                     | 1.101 (1.061 – 1.141) | <.001   |
| ACE inhibitor                                                | 1.374 (.613 – 3.078)  | .613    |
| ARB                                                          | .635 (.271 – 1.489)   | .296    |
| Coronary artery disease                                      | 1.422 (.623 – 3.245)  | .403    |
| Heart failure or cardiomyopathy                              | 2.993 (1.100 – 8.143) | .032    |
| Stroke or Transient ischemic attack                          | 1.077 (.413 – 2.806)  | .879    |
| Chronic obstructive pulmonary disease                        | 1.261 (.481 – 3.302)  | .637    |
| Chronic kidney disease (eGFR < 60mL/min/1.73m <sup>2</sup> ) | 2.301 (.969 – 5.465)  | .059    |
